# Supplementary material
Source: PubMed Central journal article supplement (PMC3326341)
Supplement: NIHMS366114-supplement-Online_only.pdf [file NIHMS366114-supplement-Online_only.pdf]

1 Table 4 (Online only). Descriptions of all serious adverse events reported among participants,  
 2 by dose level.  
 3

| Dose level                  | Description of serious adverse event                                                    |
|-----------------------------|-----------------------------------------------------------------------------------------|
| Saw palmetto extract (n=18) |                                                                                         |
| Single (320 mg)             |                                                                                         |
| 1                           | Bladder cancer                                                                          |
| 2                           | Severe gastroenteritis                                                                  |
| 3                           | Syncope with transient high grade atrioventricular block                                |
| Double (640 mg)             |                                                                                         |
| 1                           | Elective knee replacement                                                               |
| 2                           | Hospitalized for diverticulitis                                                         |
| 3                           | Hospitalized for pneumonia                                                              |
| 4                           | Gross hematuria                                                                         |
| 5                           | Elective plastic surgery                                                                |
| 6                           | Automobile accident with multiple injuries                                              |
| 7                           | Pancreatic cancer                                                                       |
| 8                           | Elective repair of abdominal aortic aneurysm                                            |
| Triple (960 mg)             |                                                                                         |
| 1                           | Cerebellar stroke*                                                                      |
| 2                           | Inferior wall myocardial infarction*                                                    |
| 3                           | Metastatic recurrent follicular thyroid carcinoma**                                     |
| 4                           | Hospitalized for radioactive iodine treatment for thyroid cancer**                      |
| 5                           | Hospitalized for chest pain due to coronary artery disease, underwent revascularization |
| 6                           | Hospitalized for hypotension due to pneumonia and chronic kidney disease                |
| 7                           | Sepsis secondary to a pelvic fracture***                                                |

4

| Placebo (n=18) |                                                                            |
|----------------|----------------------------------------------------------------------------|
| Single         |                                                                            |
| 1              | Appendectomy for appendicitis                                              |
| 2              | Back surgery for a lumbar spinal connective tissue cyst                    |
| 3              | Small bowel obstruction requiring laparoscopy lysis of adhesions           |
| 4              | Hospitalized for knee pain secondary to torn vastus lateralis muscle       |
| 5              | Hospitalized for abdominal pain, underwent laparoscopic cholecystectomy    |
| 6              | Lower gastrointestinal diverticular bleeding                               |
| 7              | Elective tonsillectomy and deviated nasal septum repair                    |
| Double         |                                                                            |
| 1              | Upper gastrointestinal bleeding requiring transfusion*                     |
| 2              | Appendectomy for ruptured appendix                                         |
| 3              | Bacterial epididymitis requiring intravenous antibiotics                   |
| 4              | Hospitalized for chest pain that proved noncardiac after study             |
| Triple         |                                                                            |
| 1              | Hospitalized after pacemaker insertion                                     |
| 2              | Colon resection for a polyp                                                |
| 3              | Elective knee replacement                                                  |
| 4              | Episode of atrial fibrillation                                             |
| 5              | Hospitalized for cellulitis of the elbow, required intravenous antibiotics |
| 6              | Hospitalized for chest pain***                                             |

5 \*Only these three SAEs were reported as possibly drug-related.  
 6 \*\*These two SAEs were reported in the same CAMUS participant.  
 7 \*\*\*These two SAEs were reported within 30 days after discontinuing the study drug.

8 Figure 2 (online only).

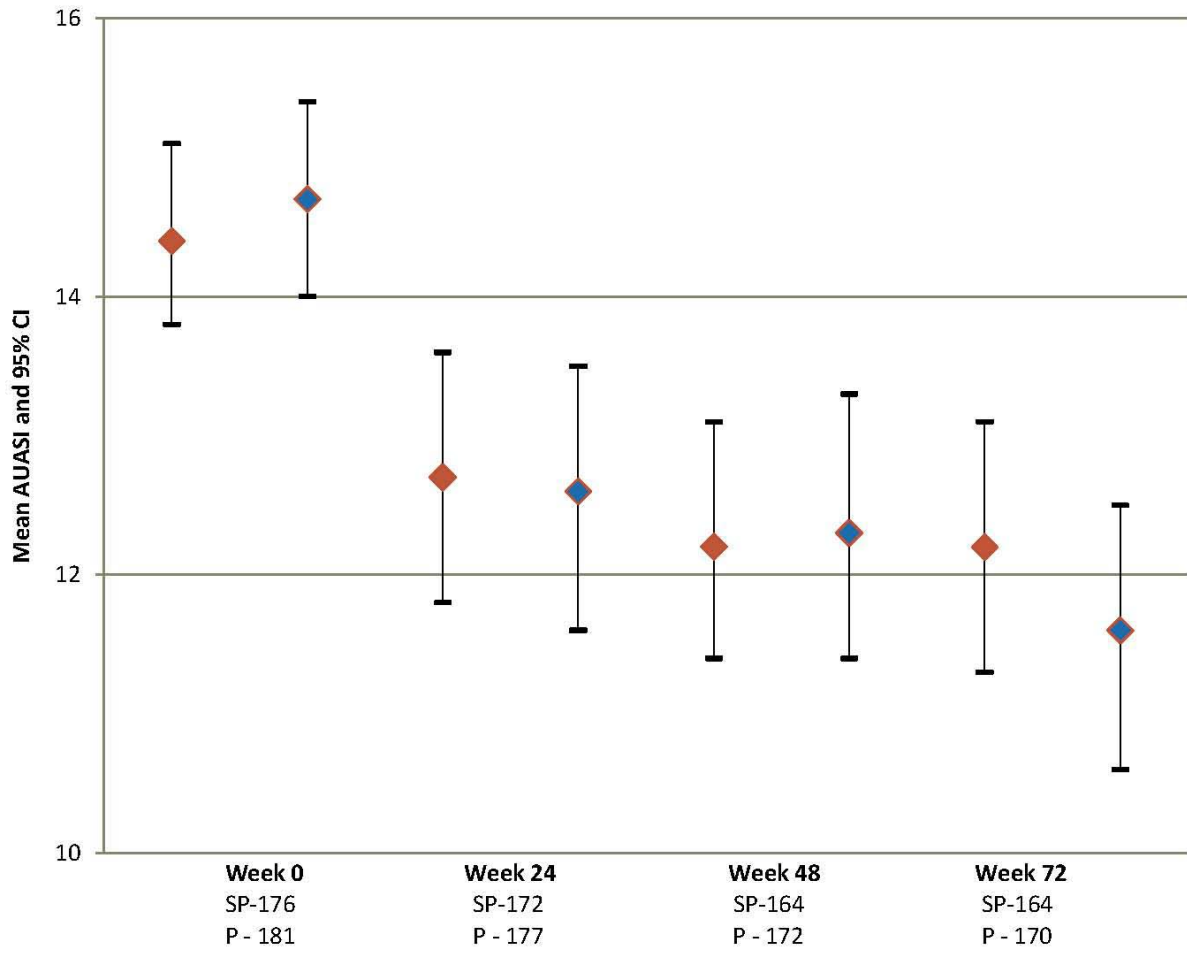

9  
10  
11  
12  
13  
14  
15  
16  
17  
18  
19  
20  
21  
22  
23  
24  
25  
26  
27  
28  
29  
30

31 Appendix (Online only). Supplemental Product Information.

32  
33 The Saw Palmetto berries for the study product were wild-collected by Euromed's Florida  
34 agricultural facility in Okeechobee, FL. Retained specimens from collections are stored at  
35 Euromed Barcelona, Spain. Visual inspections were conducted on all specimens, and testing  
36 was performed at all three stages of processing in accordance with USP monograph  
37 specifications. Two different lots were used for the trial, and all batches were tested against  
38 USP specification. Lot 1 was largely used for single and double dose therapy, and Lot 2 for  
39 triple dose therapy. Independent testing was not conducted for the trial, as the data regarding  
40 drug manufacturing and testing met the FDA IND requirements.

41  
42 The batch Quality extract of Saw Palmetto berries is standardized to a content of 85 -95 % of  
43 fatty acids.

44  
45 The analytical specifications of the Saw Palmetto extract are:

46  
47 Appearance: Dark green-brown color, oily liquid with aromatic odor  
48 Identification: GC Fingerprint  
49 Solubility: Insoluble in water, soluble in organic solvents  
50 Density at 20 C: 0.850 -0.950  
51 Loss on drying: Max. 5.0 %  
52 /n/20/D: 1.4 -1.5  
53 Content of fatty acids 85 -95 %  
54 Saponification value 220 -240  
55 Iodine value 30 -60

56

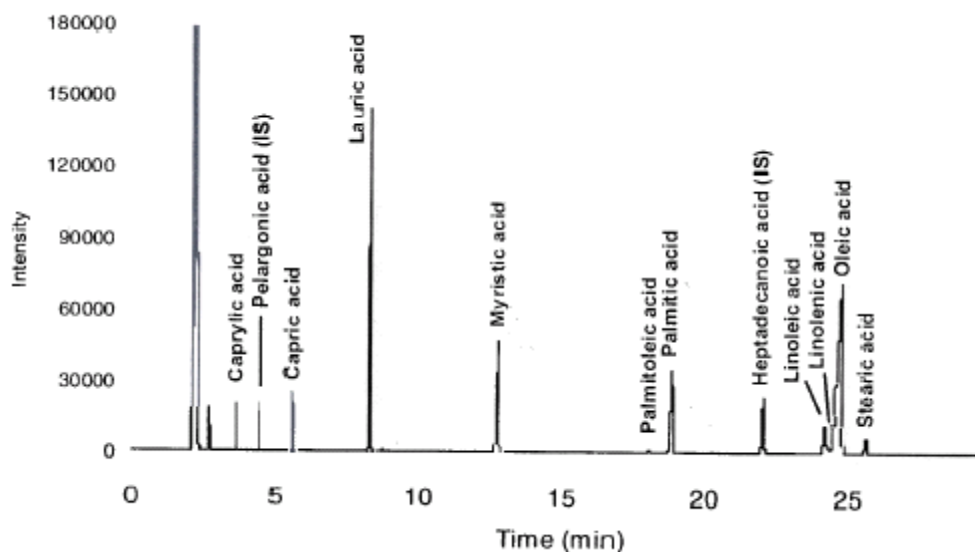

57  
58 Standard-gas chromatogram of Saw Palmetto lipidic extract from EUROMED

59
